# Supplementary material for: Addressing Suicide Risk According to Different Healthcare Professionals in Spain: A Qualitative Study
Source: Preprints.org preprint supplement (doi:10.20944/preprints201808.0514.v1), 2018-08-30
Supplement: Supplementary file 1 [file supplementary]

# Addressing suicide risk according to different healthcare professionals in Spain: a qualitative study

Juan-Luis Muñoz Sánchez<sup>1,\*</sup>, María Cruz Sánchez-Gómez<sup>2</sup>, María Victoria Martín-Cilleros<sup>2</sup>, Esther Parra-Vidales<sup>3</sup>, Diego de Leo<sup>4</sup> and Manuel A. Franco-Martín<sup>1</sup>

<sup>1</sup> Psychiatry and Mental Health Department. Hospital Universitario Río Hortega. C/ Dulzaina, 2. 47012. Valladolid. Spain.; [jlmusa@icloud.com](mailto:jlmusa@icloud.com); [mfm@intras.es](mailto:mfm@intras.es)

<sup>2</sup> Departamento Didáctica de investigación y Métodos de investigación. Facultad de Educación. Universidad de Salamanca. Paseo de Canalejas 169. 37008. Salamanca. Spain.; [mcsago@usal.es](mailto:mcsago@usal.es); [viquimc@usal.es](mailto:viquimc@usal.es)

<sup>3</sup> INTRAS Foundation. Ctra. de la Hiniesta 137. 49024. Zamora. Spain.; [stherpv@gmail.com](mailto:stherpv@gmail.com)

<sup>4</sup> Australian Institute for Suicide Research and Prevention. Griffith University, Mt Gravatt Campus, 4122. Australia.; e-mail: [d.deleo@griffith.edu.au](mailto:d.deleo@griffith.edu.au)

\* Correspondence: [jlmusa@icloud.com](mailto:jlmusa@icloud.com); Tel.: +34 679279973

**Abstract:** OBJETIVE: This study analyses the views of four groups of healthcare professionals who may play a role in the management of suicidal behaviour. The goal was to identify key factors for suicide prevention in different areas of the healthcare system. METHODOLOGY: Qualitative research was conducted using focus groups made up of different healthcare professionals who participated in the identification, management and prevention of suicidal behaviour. Professionals included were primary care physicians, psychologists, psychiatrists and emergency physicians. RESULTS: 'Suicide' was amongst the most relevant terms that came up in discussions most of the times it appeared associated with words such as 'risk', 'danger' or 'harm'. In the analysis by categories, the four groups of professionals agreed that interventions in at-risk behaviours are first in importance. Prevention was the second main concern with greater significance among psychiatrists. DISCUSSION: Primary care professionals claim for more time to address patients at risk for suicide and an easier access to and communication with the mental health network. Emergency care professionals have a lack of awareness of their role in the detection of risk for suicide in patients who seek attention at emergency care facilities for reasons of general somatic issues. Mental health care professionals are in high demand in case of self-harm but they would like to receive specific training in dealing with suicidal behaviour.

**Keywords:** Suicide; suicidal behaviour; risk of suicide; suicide prevention; health professionals.

## 1. Introduction

Suicide is a serious public health issue and one of the most frequent causes of unnatural death in the world, with approximately 800,000 people dying by it every year in the world [1]. It is one of the leading causes of death among young people, being one of the top three in the 15-44 age range and ranking second in the 15-19 age group [1]. Although the global rate of suicide in Europe is high, its epidemiology differs widely across the countries [2]. Hence, suicide prevention is at the core of the operational programme of the World Health Organization, whose aim is to lower suicide rates by 10% by the year 2020 [1]. The first step towards such goal is effective detection. There are a number of suicide risk screening and assessment strategies available to healthcare professionals, researchers and educators, but no consensus has been reached on establishing a gold standard to detect suicide risk and manage suicidal behaviour [3]. Nonetheless, the importance of risk detection in suicide prevention is clear from the fact that 91% of those who lose their lives to suicide have

44 been in touch with healthcare professionals at some point during the year before death, and that 66% are  
45 involved in some manner with the mental health network, mainly at outpatient centres [4].

46 Suicidal behaviour is usually influenced by a variety of factors whose nature can be biological, genetic,  
47 psychological, social, environmental or circumstantial [5]. In this regard, suicide and suicidal behaviour are  
48 closely linked to the kind of society in which the individual lives [6]. Nevertheless, it should be noted that a  
49 previous history of suicidal ideation is an important risk factor, and that having attempted suicide is the most  
50 relevant predictor of death by suicide [7]. In fact, approximately 60% of the transitions from suicidal ideation  
51 to planned or attempted suicide take place in the first year after the onset of such ideation [8]. On the other  
52 hand, the existence or history of mental illness is the main risk factor in the general population [9-11]; mood  
53 disorders, poor impulse-control, alcohol and substance abuse, psychotic and personality disorders are the  
54 ones that carry a higher risk of suicide and suicidal behaviour [12-14].

55 Suicidal acts are usually preceded by milder manifestations such as thoughts of death and suicidal  
56 ideation [15]. The evolution from thought to act is the transition from mild to severe symptoms in the suicidal  
57 process [16]. Suicidal behaviours are one of the leading causes of morbidity and mortality, and are closely  
58 linked to affective disorders [17, 18]. Suicide rates are generally quite higher in people suffering from mood  
59 disorders, while the frequency of attempts is lower, which might indicate a higher risk for death in individuals  
60 suffering from affective disorders [19].

61 A patient's suicide always has a huge impact on healthcare professionals, especially on those working in  
62 the area of mental health, affecting them both at the professional and the personal levels [20]. Indeed, it can  
63 increase awareness of the factors involved in suicide risk [21], although, on the other hand, being involved in  
64 the care of people at risk for suicide can also trigger rejection, fear and high levels of stress [22]. In general,  
65 healthcare professionals are sufficiently educated about suicidal behaviour, but still there are certain lacks  
66 and problems that hinder an effective approach to it [23]. Moreover, healthcare professionals often display  
67 negative attitudes towards patients with suicidal behaviours [24]. Therefore, adequate training in the  
68 detection and management of suicide risk is crucial for its prevention [25]. In this regard, there are specific  
69 training programmes for healthcare professionals to acquire skills in the assessment of suicidal behaviour and  
70 in crisis intervention that have proved effective, increasing the expertise and self-confidence of these  
71 professionals when faced with suicide-related behaviours [26]. This is why many healthcare professionals  
72 express the need for training in how to identify signs and symptoms of suicide risk [27], and over half of the  
73 mentioned professionals believe that they require preparation to successfully address patients who have  
74 already attempted it [28].

75 Primary care physicians and staff and emergency medicine professionals are those who are most closely  
76 in contact with patients at risk or who have performed a suicidal act [29-31]. While primary care physicians  
77 are front-line in suicidal risk detection [32], they frequently find it hard to identify and assess, which renders  
78 the implementation of suicide prevention programmes in the area of primary care necessary [33]. On the  
79 other hand, emergency physicians usually have problems when it comes to addressing suicidal behaviour,  
80 reporting time constraints, lack of privacy, difficulties to consult with other professionals and absence of  
81 specific action protocols as the main barriers they face [34]. This is why effective training programmes devoted  
82 to suicidal behaviour and its management are so necessary [35]. Finally, even though psychiatrists and  
83 psychologists are in closer contact with individuals at risk for suicide and are trained to bear the weight of the  
84 intervention [36], many of them lack training in current best-practice clinical guidelines for suicide risk  
85 assessment and crisis management. Psychiatrists usually take greater on responsibility in decision making as  
86 regards intervention plans for people with suicidal behaviour [37]. Psychologists, for their part, are more

concerned with the identification and treatment of the earliest signs and symptoms of risk for suicide, as well as with the prevention and eradication of risk behaviours in patients who have already attempted suicide [38-40].

The purpose of this study is to analyse the views of four groups of healthcare professionals who play a relevant role in the management of suicide risk and related behaviours with the goal of identifying the key factors for suicide prevention in different areas of the healthcare system. The research is part of the European Regions Enforcing Actions Against Suicide (EUREGENAS) European project, which brings together 11 regions with different experiences with the aim to contribute to suicide prevention in Europe [41, 42].

## **2. Materials and Methods**

### *2.1. Design*

Qualitative research was conducted using focus groups made up of different healthcare professionals who participated in the identification, management and prevention of suicidal behaviour. The study was carried out in the context of the EUREGENAS project.

### *2.2. Inclusion criteria*

A total of 56 participants were recruited based on the following inclusion criteria:

1. Healthcare professional belonging to one of the four groups selected for the study: psychiatrists, psychologists, primary care physicians and emergency medicine physicians.
2. Professional experience in the area of suicide.
3. Age between 18 and 65 years.

### *2.3. Recruitment*

Participants were recruited from different centres of the INTRAS Foundation and from different healthcare units of the province of Zamora (Spain), which was where the trial was conducted. With regard to sex, 70.6% of the participants were women and 29.4% were men. The average age of the participants was 41, and the average number of years of professional experience was 14.

Recruitment was carried out through purposive sampling, thus preventing generalization in terms of probability, and managing to register the variety of opinions on suicide prevention among the different health professionals to create as much discursive space as possible.

This deliberate sampling included healthcare professionals in the areas involved in the prevention of suicidal behaviour: primary care physicians (primary care network), psychologists/psychiatrists (mental health network) and emergency medicine physicians (emergency care network). Broadly speaking, the primary care network plays a relevant role in detecting the risk for suicide, emergency care handles suicidal behaviour, which is usually an urgent matter, and, finally, mental health professionals intervene in the reduction or eradication of the risk for suicide.

#### 2.4. Procedure

The description and understanding of the experiences, perspectives, opinions and meanings expressed by the health professionals that are in closest contact with suicide issues in terms of detection, management and treatment of suicide-related behaviours was carried out using qualitative methods. This methodological experience grants access to reality without the need for previous categorization. Participants were allowed to express themselves spontaneously in natural contexts, yielding significant research results in the area of psychiatry [43, 44] and, more specifically, in the matter of suicide [32, 45, 46]. Inter- and intra-subject information gathering was conducted using a group interview (focus group) technique, which requires participants' involvement and provides insight into their subjective scenario.

Participants were distributed into eight focus groups (two for each professional category), made up of 12 primary care physicians, 14 emergency physicians, 17 psychologists and 13 psychiatrists. The groups were structured into strata and balanced according to the socio-demographic characteristics of the participants of each professional specialty. Focus group sessions lasted between 1 and 1.5 hours and were audio and video recorded. To ensure greater objectivity, the sessions were conducted by two expert researchers in qualitative dynamics from the University of Salamanca who had no background knowledge of suicide (Sanchez-Gomez, M.C.; Martin-Cilleros, M.V.). The interviews were carried out using a script of open-ended questions drawn up in agreement with expert researchers in the mental health area (Munoz-Sanchez, J.L.; Parra-Vidales, E.; Franco-Martin, M.A) who, acting as a panel of experts, made it possible to identify the most relevant aspects in approaching, treating and preventing suicide-related behaviour (Figure 1). The goal was to avoid guided interviews where questions might hint at a desired response. Before starting the interview, and with the prior approval of the relevant ethics committee, participants signed the informed consent form and filled out a socio-demographic questionnaire to make subsequent sample characterization possible. Meetings flowed smoothly and in a very participative atmosphere, which encouraged subjects to speak freely, expressing their ideas individually and interactively. The meetings were an attempt to describe and interpret the inter- and intra-professional differences that make it possible to differentiate the meaning of suicidal behaviour prevention for each professional group.

- **Clinical relevance:** What weight do you think is given to suicide attempts in clinical practice? Is it given relevance over other conditions?
- **Prevention:** What is done towards the prevention of suicidal behaviour?
- **Current resources for intervention:** What are the current resources for intervention?
- **Difficulties in identifying suicidal behaviour:** Which are the difficulties to identify suicidal behaviour or risk for suicide?
- **Requirements for identification:** What is needed to identify suicidal behaviour and risk for suicide?
- **Difficulties involved in the management of suicidal behaviour:** Which are the current difficulties faced when treating this type of behaviour?
- **Management facilitators:** What are the current means to facilitate treatment?
- **Identification of weaknesses in treatment:** What could be done that is not being done? or What should be done to improve what is being done?
- **Accessibility of resources for prevention:** How could accessibility to and availability of care resources for suicide prevention be to succeed in such goal?

**Figure 1.** Thematic script for the healthcare professionals focus group sessions.

## 2.5. Analysis

The material obtained from focus group recording was transcribed and the generated script was coded. All the speech produced, freely and spontaneously, was considered relevant. Classical qualitative content analysis was used for textual data processing with the support of Nvivo 10 software. The steps followed were those of a basic analytical process, used in most of the research conducted with this type of data: a) data transcription; b) data layout and processing; c) drawing of results and verification of findings. It should be noted that in qualitative research these stages may overlap, since the design of qualitative research is emergent.

The analysis developed as follows: transcription of group interviews, categorization or transformation of text into data, and, finally, coding or allocation of a textual space to the corresponding category of the information gathered. Thus, a categories concept map was produced (Figure 2) according to the goals of the study, the protocol questions and the ideas expressed by the participants on aspects related to suicidal behaviour. The most representative dimensions or ideas were outlined and arranged hierarchically into 4 categories or main axes and 14 subcategories.

Categorization was carried out following the criteria of quality, thoroughness, significance, accuracy, replicability and exclusivity. Coding was conducted under the supervision of several experts in qualitative research from the University of Salamanca and of a group of mental health experts, thus ensuring credibility, dependence (reliability) and confirmability (objectivity) of the analysis process.

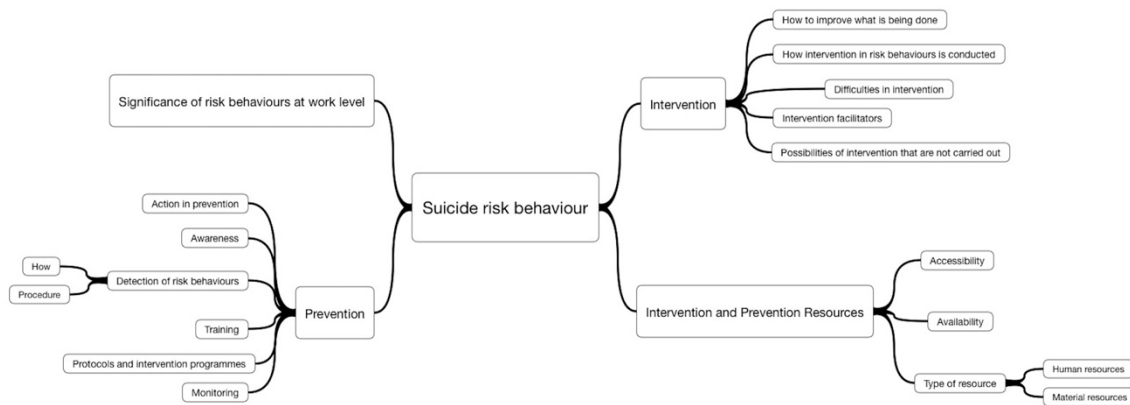

**Figure 2.** Main categories and subcategories of suicide risk behaviour significance.

### 3. Results

The qualitative analyses were conducted as follows: first, the most representative words and their meaning in the healthcare context were described to subsequently offer a profile of the main categories (coding matrix) and the relationship among them.

#### 3.1. Most representative words

First of all, an analysis of word frequency in the focus groups was carried out to examine the most frequently mentioned terms and identify the most relevant among them. The criteria established for calculating word frequency was the selection of the 50 that appeared most often. The list was refined four times, removing empty words and those with no content.

*Suicide* was amongst the most relevant terms that came up in the discourse: being the main topic approached, the professionals used it repeatedly. Most of the times it appears associated with words such as *risk*, which, in turn, appeared in its broadest sense with its common meaning of proximity of danger or harm. The term *psychiatrist* was associated by the rest of professionals to the expert of reference when it comes to the management of suicidal behaviour, placing special emphasis on the difficulties in accessing them when required for this type of cases. These two, together with the term *psychologist*, are the words that were most frequently mentioned by the participants in the study. *Primary* appears associated with *care*, since it is another of the professional areas involved in the study, and attention is drawn to the need for communication between primary care physicians, who are the first point of contact for prevention and intervention in cases of suicidal behaviour, and psychiatrists. *Primary* also appears in the context of *prevention*, the latter being another of the main axes to approach the issue of suicidal behaviour. Likewise, in connection with the word *programme*, they refer to different levels: prevention, primary, secondary and tertiary. Because it is a clinical context, one of the most frequently used words when talking about people who are at potential risk for suicidal behaviour and seek consultation at health centres was *patient*. On the other hand, according to the information collected, the term *emergency* appeared in two different contexts: the first was associated with the area of emergency care, and the second it was used to refer to immediate and necessary emergency response actions. As for the tools the different professionals rely on to work with risk behaviours, which include both human and material support, the term *resource* was frequently used. Several of the questions included in the question

protocol drawn up for the focus groups were linked to this matter, since one of the purposes was to analyse needs and availability.

### 3.2. Category profile

This section describes the relevance of each of the categories that make up the concept at the overall level and for each of the interviewed healthcare groups.

According to the coding analysis, the four groups of professionals taking part in the study agreed that intervention in risky behaviours is first in importance (852 references). Prevention work, with 348 references, was the second main concern of these groups, although it should be noted that psychiatrists attached greater significance to resources and their availability and accessibility than to suicidal behaviour prevention, against the results expressed by the other three groups. Nevertheless, it should also be remarked that the difference in psychiatrists' opinions in terms of prevention and resources was of only 9 references. On the subject of current resources, a total of 244 references were gathered. And finally, the lowest number of references was obtained by the "significance of risk behaviour at work level" category, with a total of 41 references, although the distribution among the different professional areas is homogeneous (Figure 3).

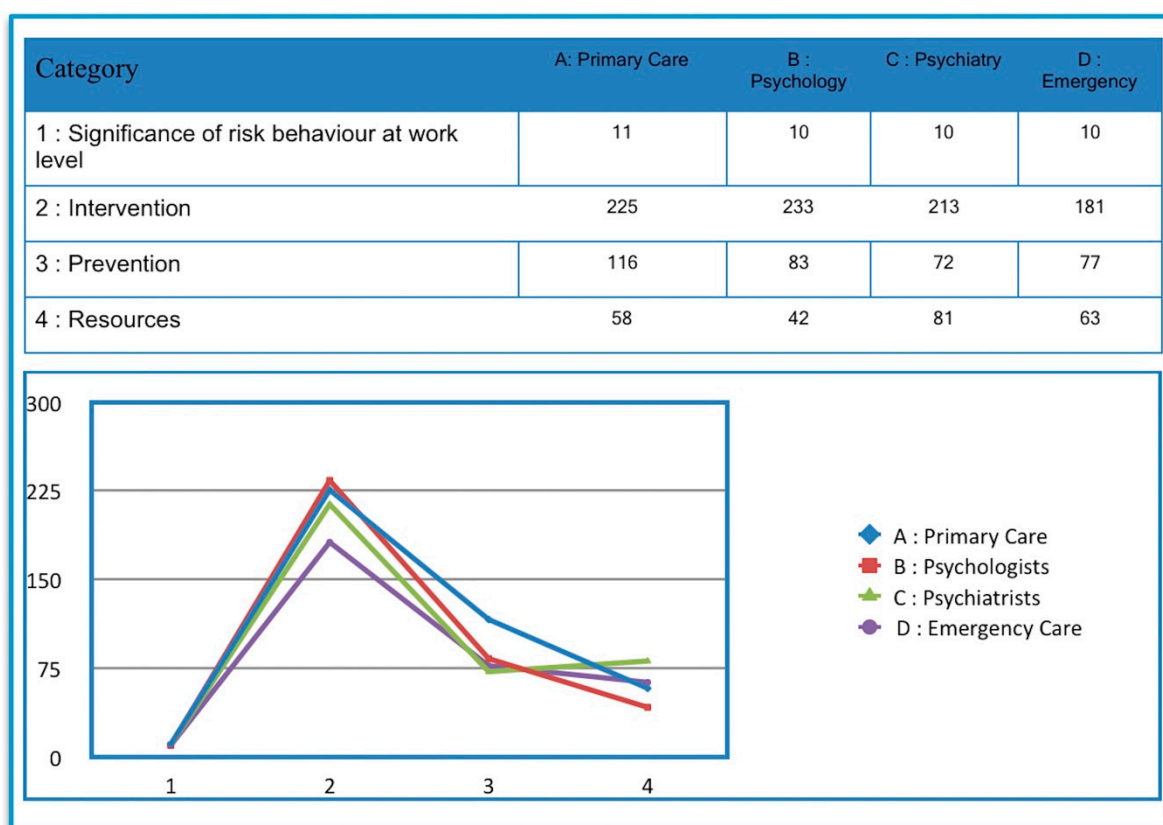

**Figure 3.** Coded references.

As regards control of the discursive field during the focus group interviews conducted, commentaries were distributed as follows according to the different professional groups: in the "Intervention" category, the most eloquent professionals were emergency physicians, followed by psychiatrists and psychologists; in the "Prevention" category, emergency physicians again made the most comments, followed by psychologists and

psychiatrists; in *"Availability of resources"*, emergency physicians prevailed once more, closely followed by psychiatrists; and finally, on the subject of *"Significance of risk behaviour"*, psychiatrists were the professionals who scored the highest in level of participation, followed by emergency physicians.

### 3.2.1. Emergency physicians

For emergency physicians, intervention in suicidal behaviour bears the most weight. The *"Difficulties in intervention"* node is the one with the highest number of codifications and, therefore, the most important for emergency care physicians, with a total of 90 references.

"I don't think I have the right training in psychiatry to assess many psychiatric patients." (Reference 4 *"Difficulties in intervention"* - Group 1 Emergency physicians).

"... our work pace in emergency care, which involves an overwhelming demand for care services. I am aware that psychiatric patients require a detailed report and that it is going to take me quite a while if I want to do it properly, as I like to." (Reference 31 *"Difficulties in intervention"* - Group 2 Emergency physicians).

The next in importance was *"How intervention in risk behaviour is conducted"*, with a total of 66 references.

"We are more concerned with the organic condition. If the patient eventually commits another autolytic attempt, or is at risk for suicide or not, is a psychiatric aspect, we always refer them to psychiatrists." (Reference 1 *"How intervention in risk behaviours is conducted"* - Group 1 Emergency physicians).

"... that is, such case requires organic care and it is given priority more than because of the assessment of risk of autolytic behaviour, because the patient's life and safety come first, and that's why we don't proceed otherwise." (Reference 46 *"How intervention in risk behaviours is conducted"* - Group 2 Emergency physicians).

This category includes contents related to methods of response in cases of risk behaviour. The third and fourth place were taken, respectively and according to number of references found in the nodes, by *"Availability of resources"* (41 references) and *"Intervention facilitators"* (38 references).

"... there is a specialist on call 24 hours that can come." (Reference 10 *"Availability of resources"* - Group 1 Emergency physicians).

"Nowadays almost every patient requires a multidisciplinary approach. Any patient you might think of, for example a patient with high blood pressure requires the action of several experts." (Reference 7 *"Intervention facilitators"* - Group 1 Emergency physicians).

Mention should be finally made of the weight given by emergency care physicians to the need to improve response actions, since the *"How to improve what is being done"* node had 31 references.



“It must be structural improvements. For example, if the problem is more personal, then a better environment is needed.” (Reference 13 “How to improve what is being done” - Group 2 Emergency physicians).

### 3.2.2. Psychiatrists

Just like emergency care physicians, psychiatrists believe intervention in suicidal behaviour is of utmost importance, but they also attach significant meaning to prevention of suicidal behaviour. It should be noted that the “*Intervention difficulties*” category includes twice as many references as the second most discussed node, “*Intervention facilitators*”. In this case, as shown in the corresponding figure, 113 references were coded for the first of the most discussed categories and 43 for the second.

“..90% of what we see are suicidal gestures. The trouble is that there are chances that autolytic behaviour as a means to an end might be accomplished. Then, making the right decision in an emergency is very difficult.” (Reference 2 “Difficulties in intervention” - Group 1 Psychiatrists).

“...most suicidal people suffer from mental illness, but there is also a part that are people who kill themselves and we didn’t know, or have escaped our attention, or didn’t have any mental illness. So I think that reaching these people is also very difficult.” (Reference 12 “Difficulties in intervention” - Group 2 Psychiatrists).

“Psychopharmacological treatment, customizing different treatment plans”. (Reference 9 “Intervention facilitators” - Group 1 Psychiatrists).

“Having a nursing service gives one a little reassurance. I feel reassured by knowing that if I’m not seeing the patient that day, or the next, the nurse may see him, or a nurse may pay a home visit and see what has happened, or how he has been feeling, or if he needs something again.” (Reference 24 “Intervention facilitators” - Group 1 Psychiatrists).

Other categories on which psychiatrists commented more extensively were “*Action in prevention*” (38 references), in the field of prevention, and “*Possibilities in intervention that are not carried out*” (35 references), in the area of intervention.

“I also think that communication between primary and specialized care is fundamental because primary care should act a little as the main filter for problem detection.” (Reference 5 “Action in prevention” - Group 1 Psychiatrists).

“We are talking of psychiatrists when psychologists would be the actual point of reference in this matter. Who better than them to assess potential risk for suicide outside the scope of the mentally-ill?” (Reference 1 “Possibilities of intervention that are not carried out” - Group 1 Psychiatrists).

### 3.2.3. Psychologists

The “*Intervention difficulties*” node yielded the highest number of codes (113), followed by “*Intervention facilitators*” (79 references).

“There are really quite a lot of impulsive acts that are not based on a perfectly outlined strategy.” (Reference 57 “Difficulties in intervention” - Group 1 Psychologists).

“... that scene is very difficult to manage if you don’t have trained and prepared support or reference groups, where you can start working a little.” (Reference 28 “Difficulties in intervention” - Group 2 Psychologists).

“It is very important to rely on and be in contact with the patient’s family, and inform the family of the existing risk.” (Reference 1 “Intervention facilitators” - Group 1 Psychologists).

However, there are not so many differences between those who work in the area of psychology and the following categories since, although psychologists were much more concerned with prevention (Action in prevention - 32 references), the number of references regarding the procedures to be followed to respond to these behaviours (How to intervene in risk behaviours - 28 references) and the possibilities to improve intervention (Possibilities in intervention that are not being carried out - 26 references) was not much lower, as is the case with Availability of current resources (27 references).

“That the patient may come to you at any time regardless of having or not having an appointment, that is, to always leave the door open for them to come, that is the first thing.” (Reference 2 “Action in prevention” - Group 2 Psychologists).

“If intervening on the emotional factors involved in the matter is the way of processing feelings. In other words, what we always do.” (Reference 8 “How intervention in risk behaviour is conducted” - Group 2 Psychologists).

“I think that each case should be looked into individually, which would help to understand and do a little more research to learn some more about how to address this issue. It shouldn’t be dismissed as only attention seeking.” (Reference 8 “Possibilities of intervention that are not carried out” - Group 1 Psychologists).

### 3.2.4. Primary care physicians

To complete the analysis of the category profiles, primary care physicians also reported the difficulties they encounter when dealing with these cases (Difficulties in intervention in risk behaviours - 115 references), followed, as in most of the mentioned professional categories, by “*Intervention facilitators*” (63 references).

“I’m not comfortable at all with this condition, I don’t think I’ve got the training to handle it, for many reasons.” (Reference 3 “Difficulties in intervention” - Group 2 Primary care physicians).

“I think time is always the main difficulty, because you can’t spend five minutes on this kind of patient, you start to ask and talk...” (Reference 45 “Difficulties in intervention” - Group 2 Primary care physicians).

“We already know many of our patients and they come to us frequently...” (Reference 1 “Intervention facilitators” - Group 2 Primary care physicians).

“The family, when a patient is at such risk the family knows what must be prevented and watched.” (Reference 7 “Intervention facilitators” - Group 2 Primary care physicians).

The third and fourth places were taken by improvement in response (How to improve what is currently done - 32 references) and “*Availability of resources*” (30 references).

“To me, personally, that we be more professional, with less patients. That is, longer consultation time” (Reference 3 “How to improve what is being done” - Group 1 Primary care physicians).

“Just as there could be a telephone or situation to detect gender-based violence, I don’t know if there is something similar for this type of behaviours. I’m not aware of it.” (Reference 14 “Availability of resources” - Group 1 Primary care physicians).

#### 4. Discussion

As it would be expected, the most representative word expressed by the focus groups was “suicide”, mainly associated with the word “risk”. The next terms that the participants used the most were “psychiatrist” and “psychologist”, which reflects the major role played by mental health professionals in the management of suicidal behaviour, as well as the frequent link between suicide and mental illness. Conversely, it is interesting to observe how the term “primary” comes up quite often in the course of the discussion in association with different terms such as “care” in the context of primary healthcare as a professional category that is closely linked to suicide, since primary care physicians have the most direct contact with patients and their families and, therefore, would be more qualified for early detection of suicide risk factors. Furthermore, primary care physicians play a major role in primary prevention, “prevention” being the second most frequent term that appears associated with “primary”, which reflects the need for intervention in the area of suicide prevention to be delivered at an early stage. Another of the most recurrent words was “resource”, which would point to the need for more human or material tools for suicide prevention.

An analysis of the findings according to each category profile shows differences among the different professional groups of participants in their perception of the approach and management of suicidal behaviour. In general, healthcare professionals consider that attending patients with suicide related behaviours is a huge challenge [26]. The results of this study show that difficulties in intervention in suicidal behaviour are the main aspect stressed by the sample of professionals that took part to this investigation. The skills of the different health professionals in the area of suicidal behaviour vary widely from one group to another, and are closely linked to the individual experience of each of them with this type of intervention [47]. The findings reveal important differences among the groups of professionals. In fact, the main question formulated by general

practitioners is knowing clearly how and when to intervene. Thus, training in theoretical models for action and in communication skills would be of the utmost importance [48].

The most remarkable difference concerns the attitude towards risk behaviours of the different professional groups under analysis. This difference is most noticeable between the emergency care group and the rest of professionals, in particular with mental health experts (psychiatrists and psychologists).

Specifically, according to professional type, one of the main issues to stress is the broad relationship between primary care physicians and individuals who perform suicidal acts, since their area of expertise entails direct contact with patients in the community. According to a recent study, approximately 80% of the individuals who die by suicide have been in contact with their primary care team during the year before the fatal act [49]. De Leo et al. [30] argue that 90% of the individuals who die by suicide seek help from the healthcare system, especially in the area of primary care, during the three months before their demise. Mention should be made of the fact that primary care physicians are a heterogeneous group of professionals with varying degrees of affinity with mental illness within their clinical practice. This picture reveals the lacks of general practitioners in the management of patients with suicidal behaviour [50]. One of the noteworthy results of our qualitative study is that most physicians who work in primary care consider that the main obstacles for intervention in the area of suicide are their lack of sufficient skills and knowledge to ensure a successful approach to the issue, a view that is also expressed by emergency medicine physicians. The perception of the existence of failures in approaching and managing patients at risk for suicide expressed by primary care physicians has been previously reported [33, 46, 51-54].

Time constraints is another difficulty - according to general practitioners -, since it prevents from adequate assessment of patients at risk of suicide. This could be explained by the tight schedule they are expected to follow when seeing patients and could be considered generally inherent to primary care services. Among factors that would make intervention easier for primary care physicians, the most outstanding are their thorough knowledge of their patients, their closeness to them and their possibility of directly accessing patients' social and family background. These facilitators play a major role in the early detection of risk for suicide and draws awareness to the fact that joint intervention with mental health services should be a key aspect when designing suicide prevention programmes. A recent qualitative study stressed the need for primary care physicians to engage the relatives of patients at risk for suicide in the decision-making process [54]. Another study by Bocquier et al. [52] analysed the abilities of a group of general practitioners in detecting the risk of suicide, yielding a great deal of variation in proper identification, which reveals the need for greater collaboration with mental health experts, as well as the need for further education and training in how to approach suicidal behaviour. Another important aspect in the area of primary care is the availability of and accessibility to the mental health network, in order to count on consultation and referral when needed.

Responses to suicidal behaviour in emergency care services are expectedly immediate, paying attention to managing a critical emergency rather than to the identification of the risk for suicide or its prevention. The results of the emergency physicians' contributions reveal that the involvement of this group of professionals in the management and prevention of suicidal behaviour is low, since their priority is to treat the physical injuries resulting from self-harm, considering that the rest of the intervention required in terms of care and prevention falls outside their competence. According to Suokas et al. [55], the skills of emergency care physicians do not vary significantly when there is a psychiatric unit in emergency care, although they generally believe in the need for such unit and are happy with it. Emergency care physicians' position of believing that suicide-related behaviour is solely the competence of mental health professionals has the obvious consequence of their having less knowledge and skills to manage and prevent it. As a result, the low level of

training in the area of suicide of emergency care physicians considerably limits detection of people at risk for suicide when suicidal ideation is not stated as the main reason for seeking medical attention at the emergency department. A recent qualitative research study conducted by Giaccherio Vedana et al. [56] using a sample of nursing professionals working in emergency services showed how these professionals express higher levels of negative feelings towards the patient and a sense of lower levels of professional competence in the area of suicidal behaviour management which is partly consistent with our results.

Experts in the area of mental health (psychiatrists and psychologists) believe that the most important aspects with regard to suicide are intervention difficulties. However, against the results yielded by the contributions of emergency and primary care physicians expressing a lack of training and skills in the management of individuals with suicidal behaviour, mental health professionals believe that they are sufficiently qualified to address this issue. This is in contrast with a recent study stating that mental health professionals' main difficulties in addressing suicidal behaviours are related to decision making [57]. Although not associated with training requirements, this is also indirectly revealed by our study, since psychiatrists acknowledge difficulties as regards intervention in and management of suicidal behaviour. It should also be emphasized that these difficulties are mostly related to distinguishing between non-suicidal self-injury, not aimed at death, and suicidal behaviour, where there is intent to die. In any case, the increasing trend towards the practice of defensive medicine would render decision-making based on patients' wellbeing as the main target more difficult [58, 59]. On the other hand, evidence shows that one out of every three mental health professionals does not regularly ask patients about ideas or thoughts related to suicide [60]. This leads to the conclusion that mental health professionals are perhaps not as aware as they should be of their need for further training and that it could be necessary for them to improve their detection and management skills, regardless of the fact that they might not know it. Either way, we believe that this should not be the main target for improvement in this field.

The results of this qualitative analysis also reveal the major role played by mental health professionals, especially psychiatrists, in addressing suicidal behaviour. In this regard, psychiatrists attach special relevance to the difficulties they have in accessing patients who are outside the mental health network and are at risk for suicide. The high number of people with suicidal behaviour who have never been referred to mental health services is quite striking [61, 62]. Mental health professionals claim better coordination with primary care as an important factor to detect cases that are not within the mental health network. This result is consistent with a qualitative research study conducted by Roelands et al. [63] involving an analysis of opinions of psychiatrists and emergency physicians, both looking to a greater collaboration between these two professional groups, as well as to a better integration of the mental health network in the area of primary care.

On the other hand, psychiatrists also seem to perceive the need for greater involvement and commitment of psychologists in the area of suicide, strongly believing in the positive effects of psychological therapies to reduce the risk for suicide. A meta-analysis conducted by Calati and Courtet in 2016 [39] confirmed the overall positive effect of psychotherapy interventions in reducing the risk for suicide. Psychiatrists also stress the importance - in everyday clinical practice - of interventions such as pharmacological treatments or community support networks. And in fact community-oriented mental health services register lower suicide rates than traditional mental health services [64].

Professionals in the area of psychology agree with psychiatrists on the difficulties involved in differentiating planned from impulsive acts of self-harm. Psychologists believe that, because of their unpredictable nature, impulsive suicide attempts are more difficult to prevent, thus requiring a more complex

intervention on the personality structure of these patients. These professionals believe in the crucial importance of a favourable social and family background towards psychological interventions, with whom to also work independently. Lack of support or referral groups is one of the main problems in the eyes of the psychologists taking part in this study. There is good evidence of the effectiveness of psychosocial interventions in suicide prevention, and in recent years we have witnessed the development of new therapies focused on the family and the environment of the individual at risk for suicide [65-70]. In agreement with psychiatrists, psychologists believe that community support networks would facilitate suicide prevention and contribute towards patient adherence to psychotherapeutic interventions, while also enhancing the chances of intervening during crises and being able to identify changes in behaviour that may hint at a potential risk for suicide. The results of a study by Gilat et al [71] using online support groups suggest that these groups allow individuals who have engaged in suicidal behaviour to create an atmosphere where they can find emotional support and alternatives to suicide to address their problems.

## **5. Conclusions**

The conclusion that can be drawn from these findings is that there are needs to be met and policies to be developed to improve the care of people at risk for suicide. The following points summarises desirable improvements in each area of the healthcare network involved in the management and treatment of suicidal behaviour.

### **5.1. Primary Care Physicians**

1. Need for more time to address patients at risk for suicide.
2. Easier access to and communication with the mental health network.
3. Availability of immediate or within 24 hours referral.
4. Lack of training in the management of suicidal behaviour.

### **5.2. Emergency Care Physicians**

- Lack of awareness of their role in the detection of risk for suicide in patients who seek attention at emergency care facilities for reasons of general somatic issues.
- They focus their response on handling the risk for death to later refer the patient to psychiatric services.

### **5.3. Mental Health Care Physicians**

- High demand, especially in self-harming behaviours that require a specific approach.
- Give more priority to psychotherapeutic interventions and improve the availability and role of clinical psychologists in the management of suicidal behaviour.
- Need for the implementation of specific programmes to address suicidal behaviour: group therapy, etc.
- Accessibility should be an important part of intervention.
- Importance of the role of a community support network, especially involving home care by nursing professionals.

Improvement in coordination with primary care for the detection of cases that are not within the mental health network.

**Author Contributions:** Conceptualization, Juan-Luis Muñoz Sánchez. and Manuel A. Franco-Martín.; methodology, María Cruz Sánchez-Gómez and María Victoria Martín-Cilleros; software, Juan-Luis Muñoz Sánchez, María Cruz Sánchez-Gómez, María Victoria Martín-Cilleros and Esther Parra-Vidales; validation, Juan-Luis Muñoz Sánchez, Esther Parra-Vidales and Manuel A. Franco-Martín; formal analysis, Juan-Luis Muñoz Sánchez, María Cruz Sánchez-Gómez and María Victoria Martín-Cilleros; investigation, Juan-Luis Muñoz Sánchez, María Cruz Sánchez-Gómez, María Victoria Martín-Cilleros, Esther Parra-Vidales, and Manuel A. Franco-Martín.; resources, Juan-Luis Muñoz Sánchez, Esther Parra-Vidales and Manuel A. Franco-Martín.; data curation, Juan-Luis Muñoz Sánchez, María Cruz Sánchez-Gómez, María Victoria Martín-Cilleros and Esther Parra-Vidales; writing—original draft preparation Juan-Luis Muñoz Sánchez and Manuel A. Franco-Martín.; writing—review and editing, Juan-Luis Muñoz Sánchez, Diego de Leo and Manuel A. Franco-Martín.; visualization, Juan-Luis Muñoz Sánchez, Diego de Leo and Manuel A. Franco-Martín.; supervision, Juan-Luis Muñoz Sánchez and Manuel A. Franco-Martín.; project administration, Juan-Luis Muñoz Sánchez and Manuel A. Franco-Martín.; funding acquisition, Juan-Luis Muñoz Sánchez and Manuel A. Franco-Martín.”.

**Funding:** This research received no external funding

**Acknowledgments:** The authors would like to thank all the participants in this study and all the partners in the Eurenas project. The Eurenas Project has received funding from the European Union under the Public Health Programme 2008-2013.

**Conflicts of Interest:** The authors declare no conflict of interest.

## References

1. WHO, Preventing Suicide: A Global Imperative. 2014.
2. Kovess-Masfety, V., et al., High and low suicidality in Europe: a fine-grained comparison of France and Spain within the ESEMeD surveys. *J Affect Disord*, 2011. **133**(1-2): p. 247-56.
3. Silverman, M.M., et al., Rebuilding the tower of Babel: a revised nomenclature for the study of suicide and suicidal behaviors. Part 1: Background, rationale, and methodology. *Suicide Life Threat Behav*, 2007. **37**(3): p. 248-63.
4. Schaffer, A., et al., Population-based analysis of health care contacts among suicide decedents: identifying opportunities for more targeted suicide prevention strategies. *World Psychiatry*, 2016. **15**(2): p. 135-45.
5. Steeg, S., et al., The exacerbating influence of hopelessness on other known risk factors for repeat self-harm and suicide. *J Affect Disord*, 2016. **190**: p. 522-8.
6. Neeleman, J., Beyond risk theory: suicidal behavior in its social and epidemiological context. *Crisis*, 2002. **23**(3): p. 114-20.
7. Ribeiro, J.D., et al., Self-injurious thoughts and behaviors as risk factors for future suicide ideation, attempts, and death: a meta-analysis of longitudinal studies. *Psychol Med*, 2015: p. 1-12.
8. Borges, G., et al., Twelve-month prevalence of and risk factors for suicide attempts in the World Health Organization World Mental Health Surveys. *J Clin Psychiatry*, 2010. **71**(12): p. 1617-28.
9. Foster, T., K. Gillespie, and R. McClelland, Mental disorders and suicide in Northern Ireland. *Br J Psychiatry*, 1997. **170**: p. 447-52.
10. Oldham, J.M., Borderline personality disorder and suicidality. *Am J Psychiatry*, 2006. **163**(1): p. 20-6.
11. Osborn, D., et al., Suicide and severe mental illnesses. Cohort study within the UK general practice research database. *Schizophr Res*, 2008. **99**(1-3): p. 134-8.

- 577 12. Kessler, R.C., G. Borges, and E.E. Walters, Prevalence of and risk factors for lifetime suicide attempts in the  
578 National Comorbidity Survey. *Arch Gen Psychiatry*, 1999. **56**(7): p. 617-26.
- 579 13. Hawton, K., et al., Comorbidity of axis I and axis II disorders in patients who attempted suicide. *Am J*  
580 *Psychiatry*, 2003. **160**(8): p. 1494-500.
- 581 14. Nock, M.K. and R.C. Kessler, Prevalence of and risk factors for suicide attempts versus suicide gestures:  
582 analysis of the National Comorbidity Survey. *J Abnorm Psychol*, 2006. **115**(3): p. 616-23.
- 583 15. Neeleman, J., R. de Graaf, and W. Vollebergh, The suicidal process; prospective comparison between early  
584 and later stages. *J Affect Disord*, 2004. **82**(1): p. 43-52.
- 585 16. Runeson, B.S., J. Beskow, and M. Waern, The suicidal process in suicides among young people. *Acta*  
586 *Psychiatr Scand*, 1996. **93**(1): p. 35-42.
- 587 17. Hawton, K., et al., Risk factors for suicide in individuals with depression: a systematic review. *J Affect*  
588 *Disord*, 2013. **147**(1-3): p. 17-28.
- 589 18. Coryell, W., et al., Risk factors for suicide in bipolar I disorder in two prospectively studied cohorts. *J Affect*  
590 *Disord*, 2016. **190**: p. 1-5.
- 591 19. Schaffer, A., et al., A review of factors associated with greater likelihood of suicide attempts and suicide  
592 deaths in bipolar disorder: Part II of a report of the International Society for Bipolar Disorders Task Force  
593 on Suicide in Bipolar Disorder. *Aust N Z J Psychiatry*, 2015. **49**(11): p. 1006-20.
- 594 20. Dransart, D.A., et al., Patient suicide in institutions: emotional responses and traumatic impact on Swiss  
595 mental health professionals. *Death Stud*, 2014. **38**(1-5): p. 315-21.
- 596 21. Gulfi, A., et al., The Impact of Patient Suicide on the Professional Practice of Swiss Psychiatrists and  
597 Psychologists. *Acad Psychiatry*, 2016. **40**(1): p. 13-22.
- 598 22. Castelli Dransart, D.A., et al., Stress reactions after a patient suicide and their relations to the profile of  
599 mental health professionals. *BMC Psychiatry*, 2015. **15**: p. 265.
- 600 23. Smith, A.R., et al., An assessment of suicide-related knowledge and skills among health professionals.  
601 *Health Psychol*, 2014. **33**(2): p. 110-9.
- 602 24. Saunders, K.E., et al., Attitudes and knowledge of clinical staff regarding people who self-harm: a  
603 systematic review. *J Affect Disord*, 2012. **139**(3): p. 205-16.
- 604 25. Palmieri, G., et al., Suicide intervention skills in health professionals: a multidisciplinary comparison. *Arch*  
605 *Suicide Res*, 2008. **12**(3): p. 232-7.
- 606 26. Mirick, R., et al., Continuing Education on Suicide Assessment and Crisis Intervention: What Can We Learn  
607 About the Needs of Mental Health Professionals in Community Practice? *Community Ment Health J*, 2016.  
608 **52**(5): p. 501-10.
- 609 27. Gaffney, P., et al., Impact of patient suicide on front-line staff in Ireland. *Death Stud*, 2009. **33**(7): p. 639-56.
- 610 28. Rothes, I.A., et al., Facing a patient who seeks help after a suicide attempt: the difficulties of health  
611 professionals. *Crisis*, 2014. **35**(2): p. 110-22.
- 612 29. Hitosugi, M., T. Nagai, and S. Tokudome, A voluntary effort to save the youth suicide via the Internet in  
613 Japan. *Int J Nurs Stud*, 2007. **44**(1): p. 157.



- 614 30. De Leo, D., et al., Contacts with health professionals before suicide: missed opportunities for prevention?  
615 Compr Psychiatry, 2013. **54**(7): p. 1117-23.
- 616 31. Fedyszyn, I.E., et al., Repeated suicide attempts and suicide among individuals with a first emergency  
617 department contact for attempted suicide: a prospective, nationwide, Danish register-based study. J Clin  
618 Psychiatry, 2016.
- 619 32. Fhaili, M.N., N. Flynn, and S. Dowling, Experiences of suicide bereavement: a qualitative study exploring  
620 the role of the GP. Br J Gen Pract, 2016. **66**(643): p. e92-8.
- 621 33. Younes, N., et al., Attempted and completed suicide in primary care: not what we expected? J Affect Disord,  
622 2015. **170**: p. 150-4.
- 623 34. Petrik, M.L., et al., Barriers and facilitators of suicide risk assessment in emergency departments: a  
624 qualitative study of provider perspectives. Gen Hosp Psychiatry, 2015. **37**(6): p. 581-6.
- 625 35. Egan, R., K.M. Sarma, and M. O'Neill, Factors influencing perceived effectiveness in dealing with self-  
626 harming patients in a sample of emergency department staff. J Emerg Med, 2012. **43**(6): p. 1084-90.
- 627 36. Simon, R.I., Behavioral risk assessment of the guarded suicidal patient. Suicide Life Threat Behav, 2008.  
628 **38**(5): p. 517-22.
- 629 37. Baca-Garcia, E., et al., Variables associated with hospitalization decisions by emergency psychiatrists after  
630 a patient's suicide attempt. Psychiatr Serv, 2004. **55**(7): p. 792-7.
- 631 38. Hepp, U., et al., Psychological and psychosocial interventions after attempted suicide: an overview of  
632 treatment studies. Crisis, 2004. **25**(3): p. 108-17.
- 633 39. Calati, R. and P. Courtet, Is psychotherapy effective for reducing suicide attempt and non-suicidal self-  
634 injury rates? Meta-analysis and meta-regression of literature data. J Psychiatr Res, 2016. **79**: p. 8-20.
- 635 40. Forkmann, T., et al., The Effects of Mindfulness-Based Cognitive Therapy and Cognitive Behavioral  
636 Analysis System of Psychotherapy added to Treatment as Usual on suicidal ideation in chronic depression:  
637 Results of a randomized-clinical trial. J Affect Disord, 2016. **200**: p. 51-7.
- 638 41. Munoz-Sanchez, J.L., et al., Use of New Technologies in the Prevention of Suicide in Europe: An  
639 Exploratory Study. JMIR Ment Health, 2017. **4**(2): p. e23.
- 640 42. Munoz-Sanchez, J.L., et al., Facilitating Factors and Barriers to the Use of Emerging Technologies for  
641 Suicide Prevention in Europe: Multicountry Exploratory Study. JMIR Ment Health, 2018. **5**(1): p. e7.
- 642 43. Whitley, R. and M. Crawford, Qualitative research in psychiatry. Can J Psychiatry, 2005. **50**(2): p. 108-14.
- 643 44. Whitley, R., Introducing psychiatrists to qualitative research: a guide for instructors. Acad Psychiatry, 2009.  
644 **33**(3): p. 252-5.
- 645 45. Fairman, N., et al., What did I miss? A qualitative assessment of the impact of patient suicide on hospice  
646 clinical staff. J Palliat Med, 2014. **17**(7): p. 832-6.
- 647 46. Michail, M. and L. Tait, Exploring general practitioners' views and experiences on suicide risk assessment  
648 and management of young people in primary care: a qualitative study in the UK. BMJ Open, 2016. **6**(1): p.  
649 e009654.
- 650 47. Scheerder, G., et al., Suicide intervention skills and related factors in community and health professionals.  
651 Suicide Life Threat Behav, 2010. **40**(2): p. 115-24.

48. Rothes, I.A. and M.R. Henriques, Health Professionals' Explanations of Suicidal Behaviour: Effects of Professional Group, Theoretical Intervention Model, and Patient Suicide Experience. *Omega (Westport)*, 2017. **76**(2): p. 141-168.
49. Stene-Larsen, K. and A. Reneflot, Contact with primary and mental health care prior to suicide: A systematic review of the literature from 2000 to 2017. *Scand J Public Health*, 2017: p. 1403494817746274.
50. Sudak, D., et al., Deficiencies in suicide training in primary care specialties: a survey of training directors. *Acad Psychiatry*, 2007. **31**(5): p. 345-9.
51. Vannoy, S.D., et al., Now what should I do? Primary care physicians' responses to older adults expressing thoughts of suicide. *J Gen Intern Med*, 2011. **26**(9): p. 1005-11.
52. Bocquier, A., et al., Physicians' characteristics associated with exploring suicide risk among patients with depression: a French panel survey of general practitioners. *PLoS One*, 2013. **8**(12): p. e80797.
53. Saini, P., K. Chantler, and N. Kapur, General practitioners' perspectives on primary care consultations for suicidal patients. *Health Soc Care Community*, 2016. **24**(3): p. 260-9.
54. Leavey, G., et al., The failure of suicide prevention in primary care: family and GP perspectives - a qualitative study. *BMC Psychiatry*, 2017. **17**(1): p. 369.
55. Suokas, J., K. Suominen, and J. Lonnqvist, The attitudes of emergency staff toward attempted suicide patients: a comparative study before and after establishment of a psychiatric consultation service. *Crisis*, 2009. **30**(3): p. 161-5.
56. Giaccherio Vedana, K.G., et al., Attitudes towards suicidal behaviour and associated factors among nursing professionals: A quantitative study. *J Psychiatr Ment Health Nurs*, 2017. **24**(9-10): p. 651-659.
57. Gale, T.M., et al., Perception of Suicide Risk in Mental Health Professionals. *PLoS One*, 2016. **11**(2): p. e0149791.
58. McCabe, R., et al., How do healthcare professionals interview patients to assess suicide risk? *BMC Psychiatry*, 2017. **17**(1): p. 122.
59. Reuveni, I., et al., Cross-sectional survey on defensive practices and defensive behaviours among Israeli psychiatrists. *BMJ Open*, 2017. **7**(3): p. e014153.
60. Roush, J.F., et al., Mental Health Professionals' Suicide Risk Assessment and Management Practices. *Crisis*, 2018. **39**(1): p. 55-64.
61. Jones, H. and A. Cipriani, Improving access to treatment for mental health problems as a major component of suicide prevention strategy. *Aust N Z J Psychiatry*, 2016. **50**(2): p. 176-8.
62. Kim, H.S., M.S. Lee, and J.Y. Hong, Determinants of Mental Health Care Utilization in a Suicide High-risk Group With Suicidal Ideation. *J Prev Med Public Health*, 2016. **49**(1): p. 69-78.
63. Roelands, M., R. Deschepper, and J. Bilsen, Psychiatric Consultation and Referral of Persons Who Have Attempted Suicide. *Crisis*, 2017. **38**(4): p. 261-268.
64. Pirkola, S., et al., Community mental-health services and suicide rate in Finland: a nationwide small-area analysis. *Lancet*, 2009. **373**(9658): p. 147-53.
65. Miklowitz, D.J. and D.O. Taylor, Family-focused treatment of the suicidal bipolar patient. *Bipolar Disord*, 2006. **8**(5 Pt 2): p. 640-51.

- 690 66. Joe, S. and H. Bryant, Evidence-Based Suicide Prevention Screening in Schools. *Child Sch*, 2007. **29**(4): p.  
691 219-227.
- 692 67. Hawton, K., et al., Psychosocial interventions following self-harm in adults: a systematic review and meta-  
693 analysis. *Lancet Psychiatry*, 2016. **3**(8): p. 740-750.
- 694 68. Meerwijk, E.L., et al., Direct versus indirect psychosocial and behavioural interventions to prevent suicide  
695 and suicide attempts: a systematic review and meta-analysis. *Lancet Psychiatry*, 2016. **3**(6): p. 544-54.
- 696 69. Cox, G. and S. Hetrick, Psychosocial interventions for self-harm, suicidal ideation and suicide attempt in  
697 children and young people: What? How? Who? and Where? *Evid Based Ment Health*, 2017. **20**(2): p. 35-40.
- 698 70. Weinstein, S.M., et al., Child- and Family-Focused Cognitive Behavioral Therapy for Pediatric Bipolar  
699 Disorder: Applications for Suicide Prevention. *Suicide Life Threat Behav*, 2017.
- 700 71. Gilat, I., Y. Tobin, and G. Shahrar, Offering support to suicidal individuals in an online support group. *Arch*  
701 *Suicide Res*, 2011. **15**(3): p. 195-206.
